# Supplementary material for: Exome Sequencing of Glioblastoma-Derived Cancer Stem Cells Reveals Rare Clinically Relevant Frameshift Deletion in MLLT1 Gene
Source: Research Square preprint supplement (doi:10.21203/rs.3.rs-754227/v1), 2021-08-24
Supplement: Supplementary file 1 [file 816e50feacc7aa0425c83b00.xlsx]

## Sheet: Foglio1
	c-specific	shared	p-specific
CSC1	6211	35744	14307
CSC2	8257	43214	8953
CSC3	27386	26728	20569
CSC4	30510	22302	47891
	c-specific	shared	p-specific
All samples	23745	62238	63920
